# Supplementary material for: Can we screen less frequently for STI among PrEP users? Assessing the effect of biannual STI screening on timing of diagnosis and transmission risk in the AMPrEP Study
Source: HighWire-hosted journal article supplement (doi:10.1136/sextrans-2022-055439), 2022-05-18
Supplement: sextrans-2022-055439supp001_data_supplement.pdf [file sextrans-2022-055439supp001_data_supplement.pdf]

**SUPPLEMENT TO:****Can we screen less frequently for STI among PrEP users? Comparing biannual versus quarterly STI screening in the AMPrEP cohort study**

Vita W. Jongen, Hanne M.L. Zimmermann, Marit Goedhart, Johannes A. Bogaards, Udi Davidovich, Liza Coyer, Henry J.C. de Vries, Maria Prins, Elske Hoornenborg, Maarten F. Schim van der Loeff, on behalf of the Amsterdam PrEP Project team in the HIV Transmission Elimination Amsterdam (H-TEAM) Initiative.

**Supplementary Table 1: Socio-demographic and sexual behaviour characteristics at baseline of PrEP users (n=366), AMPrEP cohort study, August 2015 to June 2016, Amsterdam, the Netherlands.**

|                                                                                | <i>n</i> <sup>1</sup> | <i>%</i> <sup>1</sup> |
|--------------------------------------------------------------------------------|-----------------------|-----------------------|
| <b>PrEP regimen</b>                                                            |                       |                       |
| Daily                                                                          | 268                   | 73%                   |
| Event-driven                                                                   | 98                    | 27%                   |
| <b>Age (years)</b>                                                             |                       |                       |
| Median (IQR)                                                                   | 40                    | [32-48]               |
| <35 year                                                                       | 120                   | 33%                   |
| 35 - 44 year                                                                   | 111                   | 30%                   |
| ≥45 year                                                                       | 135                   | 37%                   |
| <b>Gender identity</b>                                                         |                       |                       |
| Male                                                                           | 364                   | 99%                   |
| Transgender woman                                                              | 2                     | 1%                    |
| <b>Self-declared racial-ethnic background</b>                                  |                       |                       |
| White                                                                          | 314                   | 86%                   |
| Non-white                                                                      | 52                    | 14%                   |
| <b>Residence</b>                                                               |                       |                       |
| Amsterdam                                                                      | 223                   | 61%                   |
| Other                                                                          | 143                   | 39%                   |
| <b>Highest education level</b>                                                 |                       |                       |
| No college/university                                                          | 86                    | 24%                   |
| College/university                                                             | 280                   | 77%                   |
| <b>Employment</b>                                                              |                       |                       |
| Employed                                                                       | 282                   | 78%                   |
| Unemployed                                                                     | 80                    | 22%                   |
| <b>Monthly net income</b>                                                      |                       |                       |
| Low (≤€1700)                                                                   | 96                    | 27%                   |
| Middle (€1701 to €2950)                                                        | 150                   | 43%                   |
| High (>€2950)                                                                  | 104                   | 30%                   |
| <b>Steady relationship</b>                                                     |                       |                       |
| No                                                                             | 204                   | 56%                   |
| Yes                                                                            | 158                   | 44%                   |
| <b>Living situation</b>                                                        |                       |                       |
| Alone                                                                          | 195                   | 53%                   |
| With partner                                                                   | 116                   | 32%                   |
| With others                                                                    | 55                    | 15%                   |
| <i>Sexual behaviour</i>                                                        |                       |                       |
| <b>Sexual preference</b>                                                       |                       |                       |
| Exclusively homosexual                                                         | 288                   | 79%                   |
| Not exclusively homosexual                                                     | 77                    | 21%                   |
| <b>Number of anal sex partners<sup>2</sup>, median [IQR]</b>                   | 12                    | [6-25]                |
| <b>Number of casual partners<sup>2</sup>, median [IQR]</b>                     | 12                    | [5-23]                |
| <b>Number of anal sex acts<sup>2</sup>, median [IQR]</b>                       | 22                    | [11-36]               |
| <b>Number of anal sex acts with a casual partner<sup>2</sup>, median [IQR]</b> | 15                    | [8-28]                |
| <b>CAS with casual partner<sup>3</sup></b>                                     |                       |                       |
| No                                                                             | 16                    | 4%                    |
| Yes                                                                            | 350                   | 96%                   |
| <b>Post-exposure prophylaxis used<sup>3</sup></b>                              |                       |                       |

|                                                                      |        |     |
|----------------------------------------------------------------------|--------|-----|
| No                                                                   | 339    | 93% |
| Yes                                                                  | 27     | 7%  |
| <b>HIV-positive partner with a detectable viral load<sup>3</sup></b> |        |     |
| No                                                                   | 357    | 98% |
| Yes                                                                  | 9      | 2%  |
| <b>Any bacterial STI</b>                                             |        |     |
| Chlamydia                                                            | 35/357 | 10% |
| Gonorrhoea                                                           | 35/358 | 10% |
| Syphilis                                                             | 5/357  | 1%  |
| <i>Drug use and mental health characteristics</i>                    |        |     |
| <b>Chemsex<sup>2,4</sup></b>                                         |        |     |
| No                                                                   | 207    | 57% |
| Yes                                                                  | 154    | 43% |
| <b>Alcohol-use disorder (AUDIT)<sup>5</sup></b>                      |        |     |
| Score <8                                                             | 262    | 72% |
| Score ≥8                                                             | 100    | 28% |
| <b>Drug-use disorder (DUDIT)<sup>5</sup></b>                         |        |     |
| Score <8                                                             | 230    | 63% |
| Score ≥8                                                             | 134    | 37% |
| <b>MHI-5<sup>6</sup></b>                                             |        |     |
| Score <60                                                            | 76     | 21% |
| Score ≥60                                                            | 290    | 79% |
| <b>Sexual compulsivity score (SCS)<sup>7</sup></b>                   |        |     |
| Score <24                                                            | 283    | 78% |
| Score ≥24                                                            | 82     | 22% |

**Abbreviations:** AMPrEP, Amsterdam PrEP demonstration project; CAS, condomless anal sex act; HIV, human immunodeficiency virus; IQR, interquartile range; PrEP, pre-exposure prophylaxis

Data were missing for employment (n=4), income (n=16), steady relationship (n=4), sexual preference (n=1), syphilis diagnosis (n=9), AUDIT (n=1), DUDIT (n=2), SCS (n=1).

1. Unless stated otherwise
2. In the 3 months before baseline
3. In the 6 months before baseline
4. Defined as any gamma-hydroxybutyrate (GHB)/gamma-butyrolactone (GBL), crystalized methamphetamine or mephedrone use during sex
5. A score of eight or higher indicates possible presence of alcohol- or drug-use disorder
6. A score lower than 60 indicates possible mood or depressive mood disorder
7. A score or 24 or higher indicates a greater impact of sexual thoughts on daily functioning and an inability to control sexual thoughts or behaviour

**Supplementary Table 2: Proportion of bacterial STI diagnoses that would have been delayed and that would not have been delayed if screening was done biannually or based on symptoms rather than quarterly, AMPrEP cohort study, August 2015 to February 2020, Amsterdam, the Netherlands.**

|                                                | Total | Would not have been delayed |     | Would have been delayed |     |
|------------------------------------------------|-------|-----------------------------|-----|-------------------------|-----|
|                                                |       | <i>n</i>                    | %   | <i>n</i>                | %   |
| <b>Chlamydia</b>                               | 630   | 438                         | 70% | 192                     | 30% |
| <b>Gonorrhoea</b>                              | 848   | 598                         | 71% | 250                     | 29% |
| <b>Syphilis</b>                                | 146   | 105                         | 92% | 41                      | 28% |
| <b>Total chlamydia or gonorrhoea</b>           | 1,478 | 1036                        | 70% | 442                     | 30% |
| <b>Total chlamydia, gonorrhoea or syphilis</b> | 1,624 | 1,141                       | 70% | 483                     | 30% |

**Abbreviations:** AMPrEP, Amsterdam PrEP demonstration project; STI, sexually transmitted infection

**Supplementary Table 3. Determinants of any incident asymptomatic chlamydia or gonorrhoea among PrEP users, AMPrEP observational cohort study, August 2015 to February 2020, Amsterdam, the Netherlands.**

|                                              | # events | Person-years | Univariable Poisson model |             |         | Multivariable Poisson model |             |         |
|----------------------------------------------|----------|--------------|---------------------------|-------------|---------|-----------------------------|-------------|---------|
|                                              |          |              | IRR                       | 95% CI      | p-value | aIRR                        | 95% CI      | p-value |
| <b>Years since PrEP initiation</b>           |          |              |                           |             |         |                             |             |         |
| 1                                            | 179      | 359          | REF                       |             | 0.757   | REF                         |             |         |
| 2                                            | 156      | 338          | 0.93                      | (0.75-1.15) |         | 0.97                        | (0.77-1.20) | 0.760   |
| 3                                            | 162      | 320          | 1.02                      | (0.82-1.26) |         | 1.14                        | (0.92-1.42) | 0.227   |
| 4                                            | 119      | 259          | 0.92                      | (0.73-1.16) |         | 1.07                        | (0.82-1.41) | 0.608   |
| <b>Age, per 10 year increase<sup>1</sup></b> |          |              | 0.86                      | 0.80-0.92   | <0.001  | 0.85                        | 0.79-0.91   | <0.001  |
| <b>Age<sup>1</sup></b>                       |          |              |                           |             |         |                             |             |         |
| <35 year                                     | 176      | 308          | REF                       |             | <0.001  |                             |             |         |
| 35 - 44 year                                 | 229      | 413          | 0.97                      | 0.80-1.18   |         |                             |             |         |
| ≥45 year                                     | 231      | 582          | 0.69                      | 0.57-0.85   |         |                             |             |         |
| <b>Self-declared ethnicity<sup>2</sup></b>   |          |              |                           |             |         |                             |             |         |
| White                                        | 546      | 1117         | REF                       |             | 0.941   |                             |             |         |
| Non-white                                    | 90       | 186          | 0.99                      | 0.79-1.24   |         |                             |             |         |
| <b>Highest education level<sup>2</sup></b>   |          |              |                           |             |         |                             |             |         |
| No college/university                        | 118      | 286          | REF                       |             | 0.033   |                             |             |         |
| College/university                           | 518      | 1016         | 1.24                      | 1.01-1.51   |         |                             |             |         |
| <b>Employment<sup>2</sup></b>                |          |              |                           |             |         |                             |             |         |
| Unemployed                                   | 129      | 279          | REF                       |             | 0.452   |                             |             |         |
| Employed                                     | 500      | 1006         | 1.08                      | 0.89-1.31   |         |                             |             |         |
| <b>Sexual preference<sup>2</sup></b>         |          |              |                           |             |         |                             |             |         |
| Exclusively homosexual                       | 517      | 1029         | REF                       |             | 0.204   |                             |             |         |
| Not exclusively homosexual                   | 119      | 269          | 0.88                      | 0.72-1.07   |         |                             |             |         |
| <b>CAS with a steady partner<sup>1</sup></b> |          |              |                           |             |         |                             |             |         |
| No                                           | 7.5      | 748          | REF                       |             | 0.390   |                             |             |         |

|                                                                       |     |      |      |           |        |      |           |        |
|-----------------------------------------------------------------------|-----|------|------|-----------|--------|------|-----------|--------|
| Yes                                                                   | 5.0 | 504  | 0.93 | 0.79-1.10 |        |      |           |        |
| <b>CAS with a known casual partner<sup>1</sup></b>                    |     |      |      |           |        |      |           |        |
| No                                                                    | 114 | 347  | REF  |           | <0.001 | REF  |           | 0.008  |
| Yes                                                                   | 503 | 906  | 1.69 | 1.38-2.07 |        | 1.35 | 1.08-1.68 |        |
| <b>CAS with an unknown casual partner<sup>1</sup></b>                 |     |      |      |           |        |      |           |        |
| No                                                                    | 98  | 331  | REF  |           | <0.001 | REF  |           | <0.001 |
| Yes                                                                   | 519 | 922  | 1.90 | 1.53-2.36 |        | 1.84 | 1.45-2.34 |        |
| <b>Chemsex<sup>1,3</sup></b>                                          |     |      |      |           |        |      |           |        |
| No                                                                    | 256 | 690  | REF  |           | <0.001 | REF  |           | <0.001 |
| Yes                                                                   | 312 | 477  | 1.76 | 1.50-2.08 |        | 1.53 | 1.28-1.81 |        |
| <b>Alcohol use disorder identification test (AUDIT)<sup>1,4</sup></b> |     |      |      |           |        |      |           |        |
| Score <8                                                              | 453 | 884  | REF  |           | 0.037  | REF  |           | 0.050  |
| Score ≥8                                                              | 116 | 280  | 0.81 | 0.66-0.99 |        | 0.81 | 0.66-1.00 |        |
| <b>Drug use disorder identification test (DUDIT)<sup>1,4</sup></b>    |     |      |      |           |        |      |           |        |
| Score <8                                                              | 355 | 802  | REF  |           | <0.001 |      |           |        |
| Score ≥8                                                              | 214 | 362  | 1.34 | 1.13-1.58 |        |      |           |        |
| <b>MHI-5<sup>1,5</sup></b>                                            |     |      |      |           |        |      |           |        |
| Score ≥60                                                             | 459 | 939  | REF  |           | 0.983  |      |           |        |
| Score <60                                                             | 109 | 222  | 1.00 | 0.81-1.24 |        |      |           |        |
| <b>Sexual compulsivity score (SCS)<sup>1,6</sup></b>                  |     |      |      |           |        |      |           |        |
| Score <24                                                             | 489 | 1021 | REF  |           | 0.186  |      |           |        |
| Score ≥24                                                             | 79  | 140  | 1.18 | 0.93-1.49 |        |      |           |        |

**Abbreviations:** aIRR, adjusted incidence rate ratio; AMPrEP, Amsterdam PrEP demonstration project; CAS, condomless anal sex act; CI, confidence interval; IRR, incidence rate ratio; PrEP, pre-exposure prophylaxis

1. Time-updated
2. As reported at baseline
3. Defined as any gamma-hydroxybutyrate (GHB)/gamma-butyrolactone (GBL), crystalized methamphetamine or mephedrone use during sex
4. A score of eight or higher indicates possible presence of alcohol- or drug-use disorder
5. A score lower than 60 indicates possible mood or depressive mood disorder
6. A score of 24 or higher indicates a greater impact of sexual thoughts on daily functioning and an inability to control sexual thoughts or behaviour

## Annex 1: Acknowledgements of the H-TEAM consortium

H-TEAM members are: T. van Benthem<sup>1</sup>, D. Bons<sup>2</sup>, G.J. de Bree<sup>3,4</sup>, P. Brokx<sup>5</sup>, U. Davidovich<sup>1,6</sup>, F. Deug<sup>7</sup>, S.E. Geerlings<sup>4</sup>, M. Heidenrijk<sup>3</sup>, E. Hoornenborg<sup>1</sup>, E. Hoskam<sup>7</sup>, M. Prins<sup>1,4</sup>, P. Reiss<sup>3,5</sup>, A. van Sighem<sup>8</sup>, M. van der Valk<sup>4,8</sup>, W. Zuithof<sup>7</sup>.

H-TEAM Project Management: N. Schat<sup>3</sup>.

H-TEAM additional collaborators:

M. van Agtmael<sup>9</sup>, J. Ananworanich<sup>10</sup>, D. Van de Beek<sup>11</sup>, G.E.L. van den Berk<sup>12</sup>, D. Bezemer<sup>8</sup>, A. van Bijnen<sup>7</sup>, J.P. Bil<sup>1</sup>, W.L. Blok<sup>11</sup>, S. Bogers<sup>4</sup>, M. Bomers<sup>9</sup>, A. Boyd<sup>1,8</sup>, W. Brokking<sup>13</sup>, D. Burger<sup>14</sup>, K. Brinkman<sup>12</sup>, N. Brinkman<sup>12</sup>, M. de Bruin<sup>15</sup>, S. Bruisten<sup>1</sup>, L. Coyer<sup>1</sup>, R. van Crevel<sup>16</sup>, M. Dijkstra<sup>1</sup>, Y.T. van Duijnhoven<sup>1</sup>, A. van Eeden<sup>13</sup>, L. Elsenburg<sup>13</sup>, M.A.M. van den Elshout<sup>1</sup>, E. Ersan<sup>17</sup>, P. E.V. Felipa<sup>1</sup>, T.B.H. Geijtenbeek<sup>18</sup>, J. van Gool<sup>1</sup>, A. Goorhuis<sup>4</sup>, M. Groot<sup>13</sup>, C.A. Hankins<sup>3</sup>, A. Heijnen<sup>19,20</sup>, M.M.J. Hillebrecht<sup>8</sup>, M. Hommenga<sup>1</sup>, J.W. Hovius<sup>4</sup>, Y. Janssen<sup>21</sup>, K. de Jong<sup>1</sup>, V. Jongen<sup>1</sup>, N.A. Kootstra<sup>22</sup>, R.A. Koup<sup>23</sup>, F.P. Kroon<sup>24</sup>, T.J.W. van de Laar<sup>25,26</sup>, F. Lauw<sup>27</sup>, M. M. van Leeuwen<sup>5</sup>, K. Lettinga<sup>28</sup>, I. Linde<sup>1</sup>, D.S.E. Loomans<sup>1</sup>, I.M. van der Lubben<sup>1</sup>, J.T. van der Meer<sup>4</sup>, T. Mouhebaty<sup>7</sup>, B.J. Mulder<sup>1</sup>, J. Mulder<sup>29</sup>, F.J. Nellen<sup>4</sup>, A. Nijsters<sup>7</sup>, H. Nobel<sup>4</sup>, E.L.M. Op de Coul<sup>30</sup>, E. Peters<sup>9</sup>, I.S. Peters<sup>1</sup>, T. van der Poll<sup>4</sup>, O. Ratmann<sup>31</sup>, C. Rokx<sup>32</sup>, M.F. Schim van der Loeff<sup>1,33</sup>, W.E.M. Schoute<sup>12</sup>, J. Schouten<sup>1</sup>, J. Veenstra<sup>28</sup>, A. Verbon<sup>32</sup>, F. Verdult<sup>5</sup>, J. de Vocht<sup>9</sup>, H.J. de Vries<sup>1,33,34</sup>, S. Vrouwenraets<sup>28</sup>, M. van Vugt<sup>4</sup>, W.J. Wiersinga<sup>4</sup>, F.W. Wit<sup>4,6</sup>, L.R. Woittiez<sup>4</sup>, S. Zaheri<sup>8</sup>, P. Zantkuijl<sup>7</sup>, A. Żakowicz<sup>35</sup>, M.C. van Zelm<sup>36</sup>, H.M.L. Zimmermann<sup>1</sup>.

<sup>1</sup> Department of Infectious Diseases, Public Health Service of Amsterdam, Amsterdam, the Netherlands

<sup>2</sup> Trans United Europe, Amsterdam, The Netherlands

<sup>3</sup> Department of Global Health, Amsterdam UMC – location AMC, and Amsterdam Institute for Global Health and Development, Amsterdam, the Netherlands

<sup>4</sup> Department of Internal Medicine, Division of Infectious Diseases, Amsterdam UMC – location AMC, Amsterdam, the Netherlands

<sup>5</sup> Dutch Association of PLHIV, Amsterdam, the Netherlands

<sup>6</sup> Department of Social Psychology, University of Amsterdam, Amsterdam, the Netherlands

<sup>7</sup> Soa Aids Nederland, Amsterdam, the Netherlands

<sup>8</sup> Stichting HIV Monitoring, Amsterdam, the Netherlands

<sup>9</sup> Department of Internal Medicine, Amsterdam UMC – location VUMC, Amsterdam, the Netherlands

<sup>10</sup> US Military HIV Research Program and the Henry M. Jackson Foundation for the Advancement of Military Medicine, Bethesda, United States

<sup>11</sup> Center of Infection and Immunity Amsterdam (CINIMA), Department of Neurology, Amsterdam UMC – location AMC, Amsterdam, the Netherlands

<sup>12</sup> Department of internal medicine, OLVG – location East, Amsterdam, the Netherlands

<sup>13</sup> DC Klinieken, Amsterdam, the Netherlands

<sup>14</sup> Department of Pharmacy, Radboud University Nijmegen Medical Center, Nijmegen, the Netherlands

<sup>15</sup> Aberdeen Health Psychology Group, Institute of Applied Health Sciences, University of Aberdeen, Aberdeen, United Kingdom

<sup>16</sup> Department of Internal Medicine, Radboud University Nijmegen Medical Center, Nijmegen, the Netherlands

<sup>17</sup> Department of General Practice, Amsterdam UMC – location AMC, University of Amsterdam, Amsterdam, the Netherlands

<sup>18</sup> Laboratory of Experimental Immunology, Amsterdam UMC – location AMC Amsterdam, the Netherlands

<sup>19</sup> Sexology Center Amsterdam, Amsterdam, the Netherlands

<sup>20</sup> GP practice Heijnen & de Meij, Amsterdam, the Netherlands

<sup>21</sup> Primary Care Amsterdam and Almere (Elaa), Amsterdam, the Netherlands

<sup>22</sup> Laboratory for Viral Immune Pathogenesis, Amsterdam UMC – location AMC Amsterdam, the Netherlands

<sup>23</sup> Immunology Laboratory, Vaccine Research Center, National Institute of Allergy and Infectious Diseases, National Institutes of Health, Rockville, Maryland, USA

<sup>24</sup> Department of Infectious Diseases, Leiden University Medical Center, Leiden, the Netherlands

<sup>25</sup> Department of Medical Microbiology, OLVG, Amsterdam, the Netherlands

<sup>26</sup> Department of Donor Medicine Research, Laboratory of Blood-borne Infections, Sanquin Research, Amsterdam, the Netherlands

<sup>27</sup> Department of Internal Medicine, Medical Center Jan van Goyen, Amsterdam, the Netherlands

<sup>28</sup> Department of Internal Medicine, OLVG – location West, Amsterdam, the Netherlands

<sup>29</sup> Department of Internal Medicine, Slotervaart Hospital (former), Amsterdam, the Netherlands

<sup>30</sup> Epidemiology and Surveillance Unit, Center for Infectious Disease Control, National Institute of Public Health and the Environment, the Netherlands

<sup>31</sup> School of Public Health, Faculty of Medicine, Imperial College London, London, United Kingdom

<sup>32</sup> Department of Internal Medicine and Infectious Diseases, Erasmus Medical Center, Rotterdam, the Netherlands

<sup>33</sup> Center for Infection and Immunology, Amsterdam (CINIMA), Amsterdam UMC – location AMC, University of Amsterdam, Amsterdam, the Netherlands

<sup>34</sup> Department of Dermatology, Amsterdam UMC – location AMC, University of Amsterdam, Amsterdam, the Netherlands

<sup>35</sup> AIDS Healthcare Foundation, Amsterdam, the Netherlands

<sup>36</sup> Department of Virology, Erasmus Medical Center, Rotterdam, the Netherlands
